# Supplementary material
Source: Elsevier journal article supplement (https://www.sciencedirect.com/science/article/pii/S2255553617301076)

**Anexo 1 – Desigualdade socioeconômica na prevalência de sobrepeso em crianças e adolescentes iranianos: pesquisa de distúrbios do peso do estudo CASPIAN-IV**.

| **Província** | **Q1**  **[IC de 95%]** | **Q2**  **[IC de 95%]** | **Q3**  **[IC de 95%]** | **Q4**  **[IC de 95%]** | **Q5**  **[IC de 95%]** | **Total**  **[IC de 95%]** | **SII**  **[IC de 95%]** | **C**  **(SE)** |
| --- | --- | --- | --- | --- | --- | --- | --- | --- |
| Ardebil | 10,42[5,69,18,32] | 12,3[7,54,19,42] | 16,79[11,31,24,22] | 10,71[6,18,17,95] | 16,67[10,11,26,23] | 13,39[10,78,16,53] | -0,05[-0,19, 0,1] | 0,05(0,06) |
| Bushehr | 14,29[9,29,21,33] | 13,57[8,82,20,32] | 15,72[10,84,22,25] | 15,19[10,38,21,68] | 13,64[9,05,20,03] | 14,52[12,16,17,24] | 0,00[-0,06,0,05] | 0,00(0,05) |
| Ch. Mahal | 5,58[3,33,9,20] | 6,13[3,79,9,78] | 11,19[7,93,15,57] | 12,19[8,83,16,58] | 14,95[10,77,20,39] | 9,90[8,37,11,67] | -0,12[-0,17,-0,06] | 0,19(0,04) |
| Azerbaijão Oriental | 5,556[2,66,11,23] | 9,28[4,89,16,92] | 13,21[6,41,25,27] | 19,4[11,59,30,66] | 12,5[7,04,21,22] | 10,9[8,28,14,23] | -0,13[-0,32,0,06] | 0,19(0,07) |
| Fars | 8,42[5,22,13,31] | 9,16[6,21,13,31] | 11,68[8,46,15,92] | 10,63[7,61,14,65] | 14,41[10,42,19,59] | 10,92[9,32,12,76] | -0,06[-0,12,-0,01] | 0,09(0,04) |
| Gilan | 7,35[4,00,13,14] | 8,37[5,27,13,06] | 12,64[9,21,17,1] | 19,73[15,56,24,68] | 18,3[14,35,23,04] | 14,47[12,6,16,57] | -0,17[-0,30,-0,04] | 0,17(0,04) |
| Golestan | 6,69[4,40,10,04] | 9,43[6,67,13,18] | 12,08[8,67,16,59] | 10,66[7,05,15,8] | 15,9[11,4,21,73] | 10,47[8,91,12,27] | -0,09[-0,17,-0,01] | 0,15(0,04) |
| Hamadã | 4,62[2,58,8,16] | 9,66[6,98,13,22] | 9,31[6,46,13,24] | 14,86[10,76,20,18] | 11,93[7,91,17,62] | 9,86[8,34,11,62] | -0,09[-0,20,0,02] | 0,15(0,04) |
| Hormozgan | 2,35[1,06,5,15] | 3,96[1,99,7,73] | 6,15[3,10,11,84] | 13,95[8,09,23,01] | 18,52[7,91,37,56] | 5,57[4,09,7,54] | -0,16[-0,31,-0,01] | 0,37(0,08) |
| Ilam | 7,77[5,17,11,53] | 9,22[6,02,13,86] | 11,82[8,05,17,04] | 8,97[5,92,13,38] | 13,13[9,53,17,82] | 10,12[8,53,11,96] | -0,06[-0,14, 0,03] | 0,09(0,05) |
| Isfahan | 7,22[3,48,14,38] | 13,74[9,45,19,55] | 17,09[13,32,21,65] | 11,04[8,10,14,88] | 14,14[10,66,18,54] | 13,45[11,66,15,48] | -0,04[-0,25,0,17] | 0,01(0,04) |
| Kerman | 2,11[0,95,4,63] | 7,73[4,79,12,25] | 6,85[4,17,11,06] | 7,92[4,91,12,55] | 10,94[7,71,15,31] | 6,97[5,64,8,57] | -0,1[-0,18,-0,01] | 0,23(0,05) |
| Kermanshah | 9,09[6,11,13,32] | 8,13[5,46,11,94] | 13,39[9,62,18,33] | 14,47[10,52,19,58] | 19,63[14,89,25,44] | 12,61[10,87,14,59] | -0,13[-0,22,-0,04] | 0,17(0,04) |
| Khorasan | 6,88[3,85,12] | 4,37[2,43,7,72] | 9,49[6,44,13,77] | 10,42[7,24,14,78] | 14,83[11,02,19,66] | 9,44[7,90,11,24] | -0,11[-0,21,-0,02] | 0,20(0,05) |
| Khuzistão | 11,29[7,47,16,71] | 9,92[5,71,16,67] | 14,19[9,52,20,63] | 15,33[10,4,22,04] | 17,19[11,58,24,75] | 13,51[11,23,16,18] | -0,08[-0,16,-0,01] | 0,10(0,05) |
| Koh&Boyer | 7,10[4,76,10,46] | 9,01[5,95,13,43] | 12,68[8,83,17,86] | 13,23[9,09,18,85] | 14,14[10,62,18,59] | 10,99[9,37,12,84] | -0,10[-0,14, -0,05] | 0,14(0,04) |
| Curdistão | 8,64[6,14,12,02] | 11,99[8,95,15,88] | 10,79[7,45,15,38] | 14,29[9,98,20,04] | 16,54[11,14,23,86] | 11,63[9,97,13,52] | -0,08[-0,14,-0,01] | 0,11(0,04) |
| Lorestão | 8,94[5,54,14,11] | 7,38[3,88,13,59] | 10,31[5,63,18,14] | 16,67[11,22,24,04] | 13,92[7,87,23,45] | 11,17[8,89,13,93] | -0,08[-0,22, 0,05] | 0,14(0,06) |
| Markazi | 7,89[4,15,14,51] | 7,53[3,62,14,99] | 6,34[2,39,15,78] | 12,2[6,67,21,25] | 11,7[6,59,19,95] | 9,19[6,83,12,26] | -0,06[-0,17, 0,06] | 0,10(0,08) |
| Mazandaran | 9,86[4,77,19,29] | 18,64[12,59,26,71] | 16,19[11,8,21,82] | 16,08[12,4,20,6] | 19,1[15,71,23,03] | 17,14[15,07,19,43] | -0,09[-0,31,0,13] | 0,05(0,04) |
| Qazvin | 6,57[3,85,10,98] | 10,93[7,87,14,98] | 13,64[10,12,18,13] | 10,48[7,23,14,96] | 13,62[9,79,18,63] | 11,27[9,64,13,13] | -0,06[-0,18,0,05] | 0,08(0,04) |
| Qom | 9,91[5,57,17,03] | 10,96[7,45,15,84] | 17,95[13,54,23,41] | 17,19[13,04,22,32] | 16,67[12,63,21,67] | 15,22[13,2,17,49] | -0,10[-0,24,0,04] | 0,08(0,04) |
| Semnan | 6,42[3,09,12,87] | 11,52[7,46,17,36] | 11,28[7,95,15,78] | 17,58[13,51,22,57] | 14,03[10,7,18,18] | 13,17[11,32,15,26] | -0,11[-0,28,0,06] | 0,09(0,04) |
| Sistão-Baluchistão | 4,40[3,05,6,30] | 6,91[4,45,10,58] | 8,82[5,39,14,13] | 4,67[1,96,10,75] | 9,30[3,53,22,33] | 5,76[4,59,7,21] | -0,03[-0,12,,05] | 0,12(0,06) |
| Teerã | 9,46[4,57,18,56] | 13,39[8,48,20,49] | 14,4[10,56,19,33] | 17,48[13,73,22] | 19,52[16,23,6] | 16,62[14,62,18,85] | -0,14[-0,23,-0,05] | 0,09(0,03) |
| Azerbaijão Ocidental | 8,10[5,68,11,42] | 9,96[6,97,14,06] | 12,65[9,08,17,35] | 16,26[12,15,21,42] | 12,18[7,9,18,32] | 11,44[9,81,13,29] | -0,07[-0,17,0,04] | 0,12(0,04) |
| Yazd | 9,52[3,61,22,84] | 11,29[5,46,21,89] | 3,61[1,17,10,66] | 5,83[2,63,12,4] | 8,13[4,77,13,51] | 7,33[5,25,10,15] | 0,04[-0,16,0,24] | -0,02(0,10) |
| Zanjan | 7,29[4,64,11,28] | 7,48[5,06,10,92] | 9,64[6,69,13,7] | 14,36[10,03,20,14] | 12,37[8,35,17,93] | 9,74[8,20,11,53] | -0,08[-0,15,-0,01] | 0,13(0,05) |
| Khorasan do Norte | 8,77[6,42,11,87] | 8,39[5,81,11,96] | 11,5[7,76,16,72] | 11,73[7,77,17,33] | 14,47[9,72,21,01] | 10,2[8,65,11,98] | -0,06[-0,12,0,00] | 0,10(0,05) |
| Alborz | 13,92[7,88,23,44] | 10,47[6,69,16,01] | 16,36[12,4,21,28] | 15,28[11,92,19,38] | 15,64[12,47,19,43] | 14,9[13,07,16,94] | -0,05[-0,18, 0,08] | 0,04(0,04) |
| Irã (total) | 7,19[6,58,7,86] | 9,34[8,65,10,08] | 12,31[11,52,13,14] | 13,61[12,78,14,47] | 15,11[14,25,16,02] | 11,51[11,16,11,86] | -0,10[-0,13,-0,07] | 0,14(0,01) |

Q, quintil; C, índice de concentração; SII, *slope index of inequality*.

**Anexo 2 – Desigualdade socioeconômica na prevalência de obesidade em crianças e adolescentes iranianos: pesquisa de distúrbios do peso do estudo CASPIAN-IV.**

| **Província** | **Q1**  **[IC de 95%]** | **Q2**  **[IC de 95%]** | **Q3**  **[IC de 95%]** | **Q4**  **[IC de 95%]** | **Q5**  **[IC de 95%]** | **Total**  **[IC de 95%]** | **SII**  **[IC de 95%]** | **C**  **(SE)** |
| --- | --- | --- | --- | --- | --- | --- | --- | --- |
| Ardebil | 9,38[4,94,17,08] | 8,20[4,46,14,59] | 5,34[2,56,10,81] | 12,5[7,53,20,03] | 17,86[11,04,27,57] | 10,09[7,82,12,93] | -0,10[-0,28,0,08] | 0,15(0,08) |
| Bushehr | 10,53[6,33,17,01] | 15,71[10,57,22,73] | 13,84[9,28,20,14] | 19,62[14,14,26,57] | 20,78[15,08,27,93] | 16,26[13,78,19,1] | -0,12[-0,22,-,03] | 0,12(0,04) |
| Ch. Mahal | 3,98[2,16,7,25] | 6,13[3,79,9,78] | 4,85[2,84,8,18] | 7,89[5,25,11,69] | 11,21[7,63,16,19] | 6,68[5,43,8,19] | -0,08[-0,15,-0,01] | 0,18(0,06) |
| Azerbaijão Oriental | 15,08[9,81,22,47] | 17,53[11,16,26,44] | 13,21[6,41,25,27] | 13,43[7,12,23,9] | 18,18[11,43,27,68] | 15,78[12,62,19,55] | -0,01[-0,14,0,13] | 0,01(0,06) |
| Fars | 4,21[2,12,8,20] | 3,44[1,80,6,47] | 5,50[3,39,8,79] | 6,98[4,59,10,47] | 7,86[5,01,12,14] | 5,66[4,51,7,07] | -0,05[-0,09,-0,02] | 0,15(0,06) |
| Gilan | 14,71[9,68,21,71] | 12,81[8,87,18,16] | 15,52[11,71,20,29] | 11,9[8,67,16,14] | 14,38[10,87,18,78] | 13,82[11,99,15,87] | 0,01[-0,08,0,10] | -0,01(0,04) |
| Golestan | 6,05[3,89,9,30] | 5,35[3,35,8,44] | 6,42[4,02,10,08] | 8,63[5,43,13,45] | 14,36[10,1,20,02] | 7,60[6,28,9,18] | -0,09[-0,20,0,03] | 0,18(0,06) |
| Hamadã | 3,78[1,98,7,11] | 6,53[4,38,9,65] | 4,48[2,62,7,57] | 4,96[2,76,8,73] | 15,34[10,73,21,46] | 6,50[5,27,7,99] | -0,09[-0,27,0,09] | 0,19(0,06) |
| Hormozgan | 1,96[0,82,4,63] | 1,98[0,74,5,17] | 5,39[2,58,10,88] | 6,98[3,16,14,7] | 11,11[3,62,29,4] | 3,57[2,42,5,24] | -0,09[-0,17,-0,01] | 0,32(0,11) |
| Ilam | 2,83[1,42,5,56] | 3,23[1,54,6,62] | 4,93[2,67,8,92] | 5,56[3,25,9,34] | 9,65[6,60,13,9] | 5,27[4,14,6,69] | -0,08[-0,15,-0,02] | 0,25(0,07) |
| Isfahan | 2,06[0,51,7,88] | 7,69[4,61,12,58] | 7,60[5,14,11,09] | 6,87[4,60,10,12] | 11,18[8,10,15,25] | 7,86[6,48,9,50] | -0,08[-0,20,0,04] | 0,13(0,05) |
| Kerman | 1,76[0,73,4,16] | 2,90[1,31,6,31] | 3,65[1,84,7,14] | 6,44[3,77,10,77] | 11,32[8,03,15,74] | 5,27[4,13,6,70] | -0,12[-0,21,-0,02] | 0,36(0,06) |
| Kermanshah | 9,09[6,11,13,32] | 8,48[5,75,12,35] | 10,04[6,82,14,55] | 9,79[6,59,14,30] | 11,87[8,21,16,87] | 9,76[8,22,11,56] | -0,03[-0,07,0,00] | 0,05(0,05) |
| Khorasan | 3,75[1,69,8,10] | 4,37[2,43,7,72] | 4,35[2,42,7,69] | 8,11[5,34,12,12] | 10,27[7,13,14,56] | 6,40[5,14,7,95] | -0,09[-0,14,-0,03] | 0,21(0,06) |
| Khuzistão | 8,60 [5,33,13,59] | 8,26[4,50,14,7] | 13,55[8,99,19,9] | 12[7,68,18,26] | 17,97[12,23,25,61] | 11,89[9,75,14,44] | -0,11[-0,22,0,00] | 0,14(0,06) |
| Koh&Boyer | 2,78[1,45,5,26] | 2,15[0,89,5,06] | 4,23[2,21,7,93] | 4,76[2,49,8,90] | 4,71[2,81,7,81] | 3,66[2,75,4,86] | -0,03[-0,07,0,01] | 0,14(0,08) |
| Curdistão | 4,74[2,96,7,49] | 4,39[2,66,7,15] | 5,81[3,47,9,57] | 6,35[3,64,10,85] | 18,05[12,39,25,53] | 6,49[5,25,7,99] | -0,11[-0,32,0,09] | 0,23(0,06) |
| Lorestão | 4,47[2,25,8,70] | 8,20[4,46,14,59] | 12,37[7,15,20,56] | 14,39[9,36,21,49] | 7,60[3,44,15,92] | 9,03[6,99,11,59] | -0,06[-0,25,0,12] | 0,17(0,06) |
| Markazi | 11,4[6,72,18,69] | 8,60[4,35,16,31] | 11,11[5,38,21,57] | 15,85[9,42,25,46] | 14,89[9,01,23,63] | 12,33[9,58,15,74] | -0,07[-0,19,0,06] | 0,09(0,07) |
| Mazandaran | 11,27[5,73,20,97] | 11,86[7,15,19,05] | 10,48[6,99,15,41] | 11,25[8,19,15,28] | 18,43[15,09,22,31] | 13,94[12,06,16,06] | -0,11[-0,25, 0,03] | 0,12(0,04) |
| Qazvin | 9,09[5,80,13,97] | 5,30[3,27,8,48] | 5,94[3,72,9,36] | 11,69[8,44,16,33] | 22,55[17,65,28,35] | 10,48[8,91,12,29] | -0,16[-0,41,0,08] | 0,25(0,05) |
| Qom | 6,31[3,03,12,65] | 13,7[9,74,18,93] | 11,54[8,03,16,31] | 12,5[8,97,17,15] | 17,42[13,3,22,49] | 13,1[11,22,15,25] | -0,10[-0,25,0,05] | 0,10(0,04) |
| Semnan | 3,67[1,38,9,38] | 5,46[2,86,10,16] | 5,06[2,96,8,52] | 6,59[4,19,10,23] | 15,52[12,02,19,81] | 8,43[6,95,10,19] | -0,15[-0,29,-0,01] | 0,28(0,05) |
| Sistão-Baluchistão | 3,30[2,16,5,01] | 1,46[0,55,3,82] | 2,35[0,88,6,11] | 6,54[3,15,13,1] | 9,30[3,53,22,33] | 3,25[2,39,4,40] | -0,05[-0,18,0,08] | 0,08(0,09) |
| Teerã | 5,41[2,04,13,55] | 8,66[4,86,14,98] | 7,6[4,90,11,61] | 12,88[9,66,16,98] | 13,57[10,61,17,2] | 11,11[9,45,13,02] | -0,12[-0,22,-0,02] | 0,13(0,04) |
| Azerbaijão Ocidental | 3,91[2,33,6,50] | 4,63[2,70,7,81] | 6,72[4,22,10,55] | 11,79[8,31,16,46] | 12,82[8,42,19,05] | 7,19[5,90,8,73] | -0,11[-0,18,-0,04] | 0,26(0,05) |
| Yazd | 0 | 11,29[5,46,21,89] | 16,87[10,23,26,54] | 11,65[6,72,19,44] | 11,25[7,19,17,18] | 11,33[8,71,14,62] | -0,11[-0,51,0,29] | 0,05(0,07) |
| Zanjan | 5,26[3,08,8,86] | 5,61[3,56,8,73] | 7,5[4,94,11,23] | 7,45[4,46,12,19] | 16,67[11,97,22,74] | 7,94[6,55,9,59] | -0,11[-0,26,0,04] | 0,21(0,06) |
| Khorasan do Norte | 3,56[2,15,5,82] | 3,73[2,13,6,45] | 6,00[3,44,10,27] | 10,06[6,42,15,4] | 7,24[4,05,12,6] | 5,33[4,23,6,71] | -0,06[-0,14,0,02] | 0,20(0,07) |
| Alborz | 5,06[1,91,12,74] | 6,40[3,57,11,19] | 7,06[4,55,10,81] | 8,33[5,89,11,67] | 12,09[9,30,15,56] | 8,83[7,41,10,5] | -0,10[-0,13,-0,06] | 0,15(0,05) |
| Irã (total) | 5,19[4,67,5,76] | 6,26[5,69,6,88] | 7,40[6,78,8,07] | 9,43[8,74,10,18] | 13,5[12,68,14,37] | 8,35[8,05,8,66] | -0,10[-0,16,-0,04] | 0,19(0,01) |

Q, quintil; C, índice de concentração; SII, *slope index of inequality*.

**Anexo 3 – Desigualdade socioeconômica na prevalência de obesidade abdominal em crianças e adolescentes iranianos: pesquisa de distúrbios do peso do estudo CASPIAN-IV.**

| **Província** | **Q1**  **[IC de 95%]** | **Q2**  **[IC de 95%]** | **Q3**  **[IC de 95%]** | **Q4**  **[IC de 95%]** | **Q5**  **[IC de 95%]** | **Total**  **[IC de 95%]** | **SII**  **[IC de 95%]** | **C**  **(SE)** |
| --- | --- | --- | --- | --- | --- | --- | --- | --- |
| Ardebil | 29,17[20,94,39,04] | 27,64[20,45,36,22] | 20[13,97,27,78] | 28,83[21,15,37,95] | 29,41[20,69,39,95] | 26,61[23,05,30,49] | -0,01[-0,22,0,20] | 0,00(0,04) |
| Bushehr | 17,16[11,67,24,53] | 24,29[17,88,32,08] | 23,27[17,34,30,48] | 22,78[16,89,29,99] | 24,18[18,04,31,61] | 22,45[19,58,25,59] | -0,06[-0,19,0,07] | 0,04(0,04) |
| Ch. Mahal | 10,76[7,48,15,24] | 12,64[9,13,17,26] | 14,87[11,09,19,65] | 18,35[14,22,23,34] | 19,63[14,83,25,50] | 15,16[13,29,17,24] | -0,11[-0,14,-0,08] | 0,12(0,04) |
| Azerbaijão Oriental | 22,22[15,78,30,34] | 26,8[18,91,36,50] | 22,64[13,30,35,83] | 29,41[19,79,41,30] | 27,27[18,97,37,52] | 25,46[21,56,29,80] | -0,06[-0,21,0,08] | 0,04(0,04) |
| Fars | 11,52[7,70,16,88] | 11,83[8,44,16,34] | 15,46[11,74,20,09] | 20,20[16,04,25,11] | 16,16[11,93,21,51] | 15,37[13,49,17,46] | -0,08[-0,21,0,04] | 0,09(0,03) |
| Gilan | 22,79[16,5,30,60] | 21,18[16,1,27,35] | 23,47[18,84,28,82] | 26,53[21,79,31,88] | 26,06[21,45,31,27] | 24,40[22,07,26,90] | -0,06[-0,13,0,01] | 0,04(0,03) |
| Golestan | 12,42[9,20,16,56] | 13,88[10,49,18,15] | 16,98[12,92,22,00] | 16,33[11,78,22,19] | 23,59[18,15,30,06] | 16,01[14,10,18,12] | -0,11[-0,22,0,00] | 0,11(0,04) |
| Hamadã | 9,66[6,50,14,13] | 19,03[15,26,23,48] | 15,46[11,74,20,09] | 21,62[16,69,27,53] | 23,86[18,13,30,72] | 17,59[15,6,19,78] | -0,13[-0,28,0,02] | 0,12(0,03) |
| Hormozgan | 6,28[3,87,10,01] | 5,94[3,40,10,18] | 11,54[7,07,18,28] | 20,93[13,59,30,82] | 25,93[12,87,45,34] | 9,71[7,73,12,15] | -0,21[-0,4,-0,01] | 0,27(0,07) |
| Ilam | 8,51[5,77,12,39] | 12,39[8,63,17,47] | 14,29[10,11,19,81] | 13,73[9,88,18,79] | 21,71[17,09,27,16] | 14,07[12,21,16,16] | -0,14[-0,26,-0,03] | 0,17(0,04) |
| Isfahan | 14,29[8,64,22,7] | 22,95[17,42,29,61] | 22,15[17,91,27,07] | 20,6[16,60,25,27] | 19,14[15,09,23,97] | 20,49[18,32,22,83] | -0,02[-0,22,0,18] | -0,01(0,03) |
| Kerman | 4,91[2,93,8,13] | 11,06[7,46,16,1] | 10,00[6,67,14,73] | 12,38[8,50,17,68] | 17,74[13,59,22,82] | 11,1[9,43,13,03] | -0,14[-0,24,-0,04] | 0,2(0,04) |
| Kermanshah | 19,05[14,66,24,38] | 16,96[13,02,21,8] | 20,92[16,22,26,55] | 22,55[17,65,28,35] | 24,66[19,39,30,80] | 20,60[18,43,22,96] | -0,08[-0,07,0,00] | 0,06(0,03) |
| Khorasan | 11,88[7,70,17,88] | 9,6[6,51,13,93] | 14,62[10,78,19,54] | 15,89[11,91,20,88] | 21,76[17,17,27,17] | 15,05[13,12,17,20] | -0,14[-0,24,-0,03] | 0,15(0,04) |
| Khuzistão | 14,97[10,53,20,85] | 19,83[13,65,27,91] | 24,18[18,04,31,61] | 22,00[16,07,29,35] | 21,88[15,54,29,88] | 20,3[17,55,23,36] | -0,08[-0,22,0,06] | 0,07(0,04) |
| Koh&Boyer | 7,69[5,25,11,14] | 7,27[4,56,11,38] | 7,98[5,02,12,47] | 10,58[6,93,15,84] | 14,48[10,91,18,96] | 9,70[8,18,11,46] | -0,08[-0,19,0,02] | 0,15(0,05) |
| Curdistão | 13,33[10,19,17,26] | 13,99[10,71,18,09] | 15,35[11,33,20,48] | 18,09[13,21,24,26] | 25,56[18,86,33,66] | 15,89[13,97,18,01] | -0,12[-0,25,0,02] | 0,11(0,04) |
| Lorestão | 10,00[6,38,15,33] | 13,11[8,18,20,36] | 20,62[13,69,29,84] | 27,27[20,34,35,51] | 17,72[10,77,27,76] | 17,05[14,26,20,25] | -0,14[-0,40,0,12] | 0,17(0,05) |
| Markazi | 14,91[9,45,22,72] | 16,13[9,95,25,09] | 23,08[14,39,34,87] | 29,27[20,43,40,01] | 17,02[10,68,26,03] | 19,42[16,00,23,36] | -0,14[-0,26,-0,03] | 0,07(0,05) |
| Mazandaran | 18,31[10,93,29,05] | 27,97[20,61,36,74] | 23,33[18,10,29,54] | 24,19[19,74,29,28] | 34,98[30,68,39,53] | 28,23[25,7,30,90] | -0,2[-0,48,0,08] | 0,09(0,03) |
| Qazvin | 15,66[11,23,21,41] | 18,21[14,25,22,98] | 20,7[16,38,25,81] | 20,56[15,98,26,06] | 31,91[26,26,38,15] | 21,37[19,20,23,72] | -0,16[-0,33,0,00] | 0,12(0,03) |
| Qom | 6,36[3,06,12,76] | 16,44[12,09,21,96] | 15,02[10,98,20,21] | 16,08[12,06,21,12] | 17,11[13,02,22,16] | 15,19[13,16,17,46] | -0,1[-0,29,0,10] | 0,07(0,04) |
| Semnan | 11,82[6,98,19,31] | 16,36[11,46,22,82] | 15,95[11,96,20,96] | 20,8[16,4,26,02] | 26,87[22,38,31,88] | 19,98[17,76,22,41] | -0,19[-0,28,-0,11] | 0,14(0,03) |
| Sistão-Baluchistão | 6,10[4,89,8,25] | 3,636[1,97,6,63] | 4,65[2,34,9,03] | 10,28[5,78,17,63] | 11,90[5,04,25,61] | 5,91[4,72,7,37] | -0,05[-0,19,0,09] | 0,04(0,07) |
| Teerã | 13,51[7,42,23,35] | 18,9[12,99,26,66] | 24,9[19,91,30,65] | 26,52[22,02,31,57] | 33,17[28,82,37,83] | 26,9[24,46,29,49] | -0,27[-0,44,-0,09] | 0,11(0,03) |
| Azerbaijão Ocidental | 13,13[10,00,17,04] | 11,03[7,86,15,27] | 13,83[10,10,18,67] | 23,36[18,47,29,09] | 24,05[18,02,31,33] | 16,07[14,17,18,18] | -0,15[-0,33,0,02] | 0,15(0,04) |
| Yazd | 7,14[2,31,20,00] | 20,97[12,56,32,89] | 16,87[10,23,26,53] | 11,76[6,79,19,62] | 20,12[14,66,26,98] | 16,56[13,4,20,28] | -0,09[-0,48,0,29] | 0,07(0,06) |
| Zanjan | 12,10[8,58,16,78] | 13,71[10,36,17,93] | 17,14[13,16,22,02] | 21,28[16,27,72] | 27,96[21,97,34,84] | 17,5[15,47,19,73] | -0,18[-0,27,-0,08] | 0,16(0,03) |
| Khorasan do Norte | 14,22[11,20,17,89] | 16,15[12,52,20,59] | 23,50[18,13,29,88] | 29,61[23,37,36,71] | 31,58[24,68,39,40] | 20,39[18,27,22,7] | -0,21[-0,33,-0,10] | 0,18(0,03) |
| Alborz | 17,72[10,78,27,75] | 15,12[10,5,21,29] | 19,33[15,04,24,50] | 21,17[17,25,25,71] | 25,00[21,10,29,35] | 21,03[18,9,23,33] | -0,13[-0,21,-0,04] | 0,09(0,03) |
| Irã (total) | 11,98[11,21,12,80] | 15,04[14,19,15,94] | 17,53[16,61,18,48] | 20,64[19,66,21,66] | 24,21[23,17,25,28] | 17,87[17,46,18,3] | -0,15[-0,17,-0,13] | 0,13(0,01) |

Q, quintil; C, índice de concentração; SII, *slope index of inequality*.

**Anexo 4 – Índice de concentração de distúrbios do peso em nível provincial: pesquisa de distúrbios do peso do estudo CASPIAN IV**.
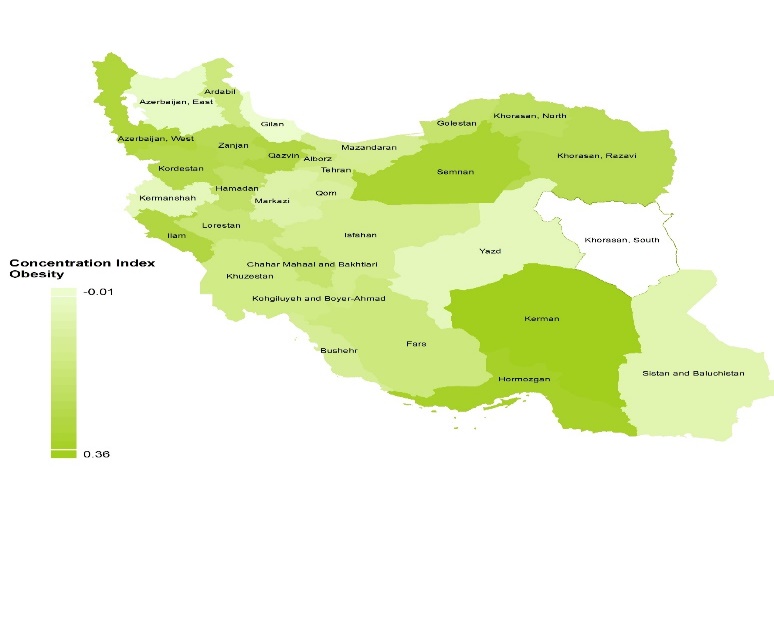

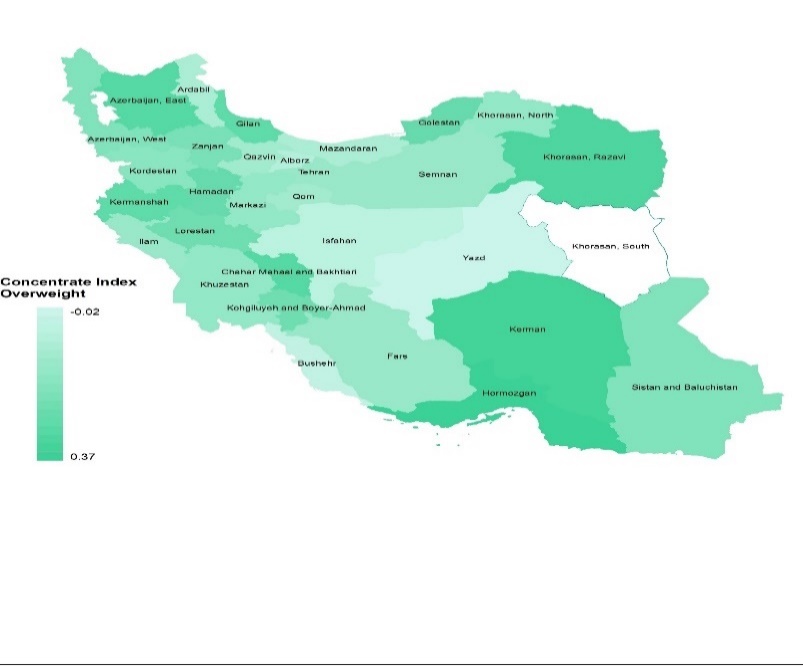

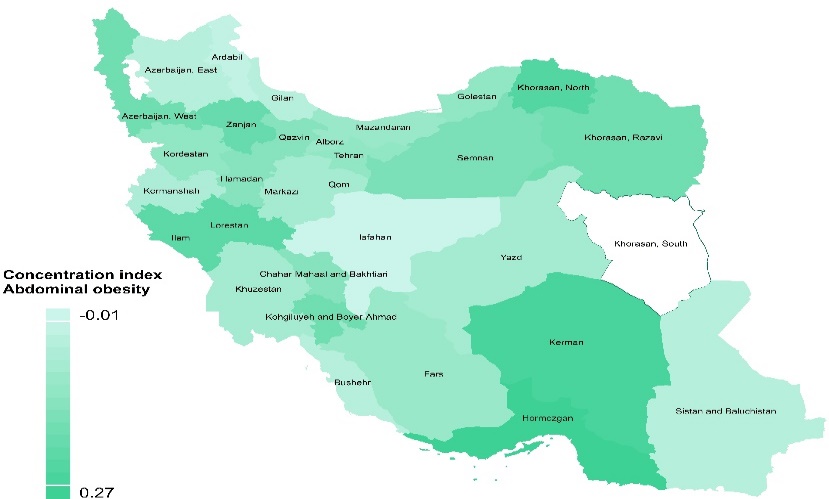

Supplement: mmc1 [file S2255553617301076:mmc1.docx]
